# Supplementary material for: Theoretical investigations of novel Janus Pb2SSe monolayer as a potential multifunctional material for piezoelectric, photovoltaic, and thermoelectric applications
Source: Royal Society of Chemistry journal article supplement (doi:10.1039/d1nr03440e), 2021-01-01
Supplement: d1nr03440e1.pdf [file d1nr03440e1.pdf]

# **Theoretical investigations of novel Janus Pb<sub>2</sub>SSe monolayer as a potential multifunctional material for piezoelectric, photovoltaic and thermoelectric applications**

Fusheng Zhang,<sup>1</sup> Jian Qiu,<sup>2</sup> Haojie Guo,<sup>1</sup> Lingmei Wu,<sup>1</sup> Bao Zhu,<sup>2</sup> Kai Zheng,<sup>1</sup> Hui Li,<sup>1</sup> Zeping Wang,<sup>1</sup> Xianping Chen<sup>\*1</sup> and Jiabing Yu<sup>\*1</sup>

*<sup>1</sup>Key Laboratory of Optoelectronic Technology & Systems, Education Ministry of China, and College of Optoelectronic Engineering, State Key Laboratory of Power Transmission Equipment & System Security and New Technology, Chongqing University, Chongqing 400044, China; [orcid.org/0000-0002-2461-4010](https://orcid.org/0000-0002-2461-4010).*

*<sup>2</sup>Faculty of Mechanical and Electrical Engineering, Guilin University of Electronic Technology, Guilin 541004, China.*

*\*Corresponding author (Email: [xianpingchen@cqu.edu.cn](mailto:xianpingchen@cqu.edu.cn) and [yujiab@cqu.edu.cn](mailto:yujiab@cqu.edu.cn))*

## Bonding properties

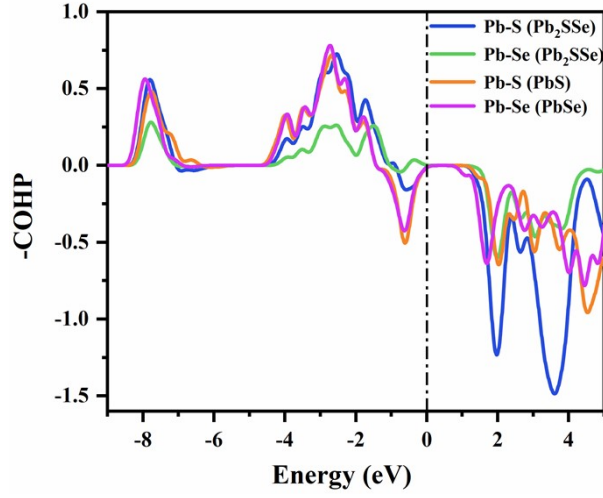

**Fig. S1.** The normalized COHP for Pb-S and Pb-Se in Pb<sub>2</sub>SSe monolayer and Pb-S for PbS monolayer and Pb-Se monolayer.

**Table S1.** ICOHP (eV) for different bond interactions with Pb<sub>2</sub>SSe, PbS and PbSe monolayer.

| phase | Pb-S (Pb <sub>2</sub> SSe) | Pb-Se (Pb <sub>2</sub> SSe) | Pb-S (PbS) | Pb-Se (PbSe) |
|-------|----------------------------|-----------------------------|------------|--------------|
| ICOHP | -2.92                      | -1.21                       | -2.11      | -2.13        |

## Thermodynamic stability

The formation energy of a 2D material can be obtained by the following equation:<sup>1</sup>

$$\Delta E_f = \frac{E_{2D}}{N_{2D}} - \frac{E_{3D}}{N_{3D}} \quad (S1)$$

where  $E_{2D}$  and  $E_{3D}$  represent the energies of the monolayer and bulk material, respectively, and  $N_{2D}$  and  $N_{3D}$  are the numbers of atoms in the respective unit cells. The energy above hull can be described by the formation enthalpy ( $\Delta H$ ) of 2D Pb<sub>2</sub>SSe using the relation: <sup>2</sup>

$$\Delta H_{Pb_2SSe} = E_{Pb_2SSe} - [xE_{PbS} + (1-x)E_{Se}] \quad (S2)$$

in which  $E_{Pb_2SSe}$  and  $E_{PbS}$  are the energy of  $Pb_2SSe$  and  $PbS$  monolayers, and  $E_{Se}$  represents the energy of pure Se element.

### Mechanical stability

**Table S2.** Calculated Elastic Stiffness Constants  $C$  (N/m) of  $Pb_2SSe$  monolayer.

| system    | $C_{11}$ | $C_{12}$ | $C_{22}$ | $C_{44}$ | Status |
|-----------|----------|----------|----------|----------|--------|
| $Pb_2SSe$ | 34.1     | 20.9     | 46.5     | 16.9     | stable |

The mechanical stability of  $Pb_2SSe$  monolayer has been verified by the satisfaction of Born criterion:

$$C_{11} > 0, C_{22} > 0, C_{44} > 0, C_{11}C_{22} > C_{12}^2$$

### Young's modulus and Poisson's ratio:

The angle-dependent Young's modulus  $Y(\theta)$  and Poisson's ratio  $\nu(\theta)$  can be computed using the following formula:

$$Y(\theta) = \frac{C_{11}C_{22} - C_{12}^2}{C_{11}s^4 + C_{22}c^4 + \left(\frac{C_{11}C_{22} - C_{12}^2}{C_{66}} - 2C_{12}\right)c^2s^2} \quad (S3)$$

$$\nu(\theta) = \frac{C_{12}(c^4 + s^4) - \left(C_{11} + C_{22} - \frac{C_{11}C_{22} - C_{12}^2}{C_{66}}\right)c^2s^2}{C_{11}s^4 + C_{22}c^4 + \left(\frac{C_{11}C_{22} - C_{12}^2}{C_{66}} - 2C_{12}\right)c^2s^2} \quad (S4)$$

where  $c$  and  $s$  represent  $\cos \theta$  and  $\sin \theta$ , respectively.

### Computation of power conversion efficiency (PCE) and optical absorption coefficient

The optical absorption coefficients of both monolayers and heterostructures were calculated from the frequency-dependent dielectric function,  $\epsilon(\omega)$ , using the following formula:

$$\alpha(\omega) = \sqrt{2\omega[\sqrt{\varepsilon_1^2(\omega) + \varepsilon_2^2(\omega)} - \varepsilon_1(\omega)]^{1/2}} \quad (\text{S5})$$

in which  $\varepsilon_1(\omega)$  and  $\varepsilon_2(\omega)$  are the real and imaginary part of the complex dielectric function.

The power conversion efficiency (PCE) of  $\text{Pb}_2\text{SSe}/\text{SnSe}$  and  $\text{Pb}_2\text{SSe}/\text{GeSe}$  vdW heterostructure can be expressed by<sup>3</sup>

$$\eta = \frac{\beta_{FF} V_{OC} J_{SC}}{P_{solar}} = \frac{0.65(E_g^d - \Delta E_c - 0.3) \int_{E_g^d}^{\infty} P(\hbar\omega) d(\hbar\omega)}{\int_0^{\infty} P(\hbar\omega) d(\hbar\omega)} \quad (\text{S6})$$

where  $P_{solar}$  is the total incident solar radiation,  $P(\hbar\omega)$  is the AM 1.5 solar energy flux in units of  $\text{Wm}^{-2}\text{eV}^{-1}$  and  $\hbar\omega$  is the photo energy.  $\beta_{FF}$  is the fill factor, equaling to 0.65.  $V_{OC} = E_g^d - \Delta E_c - 0.3$  represents the maximum open-circuit voltage, where  $E_g^d$  is the donor band gap and  $\Delta E_c$  is the conduction band offset.

### The temperature- and doping-dependent electrical transport properties

$$n_h(T, \mu) = \frac{2}{P} \iint_{BZ} [1 - f_0(T, \varepsilon, \mu) D(\varepsilon)] d\varepsilon \quad (\text{S7})$$

$$n_e(T, \mu) = \frac{2}{P} \iint_{BZ} f_0(T, \varepsilon, \mu) D(\varepsilon) d\varepsilon \quad (\text{S8})$$

$$S_{\alpha\beta}(T, \mu) = \frac{1}{eTP\sigma_{\alpha\beta}(T, \mu)} \int \bar{\sigma}_{\alpha\beta}(\varepsilon)(\varepsilon - \mu) \left[ -\frac{\partial f_0(T, \varepsilon, \mu)}{\partial \varepsilon} \right] d\varepsilon \quad (\text{S9})$$

$$\sigma_{\alpha\beta}(T, \mu) = \frac{2}{P} \int \bar{\sigma}_{\alpha\beta}(\varepsilon) \left[ -\frac{\partial f_0(T, \varepsilon, \mu)}{\partial \varepsilon} \right] d\varepsilon \quad (\text{S10})$$

$$\kappa_{\alpha\beta}^e(T, \mu) = \frac{1}{e^2 TP} \int \bar{\sigma}_{\alpha\beta}(\varepsilon)(\varepsilon - \mu)^2 \left[ -\frac{\partial f_0(T, \varepsilon, \mu)}{\partial \varepsilon} \right] d\varepsilon \quad (\text{S11})$$

where  $P$  is the volume of the unit cell,  $f_0$  is the Fermi-Dirac distribution,  $\mu$  represents the chemical potential,  $D(\varepsilon)$  is the density of states,  $\bar{\sigma}_{\alpha\beta}(\varepsilon)$  is the energy dependent conductivity tensor.

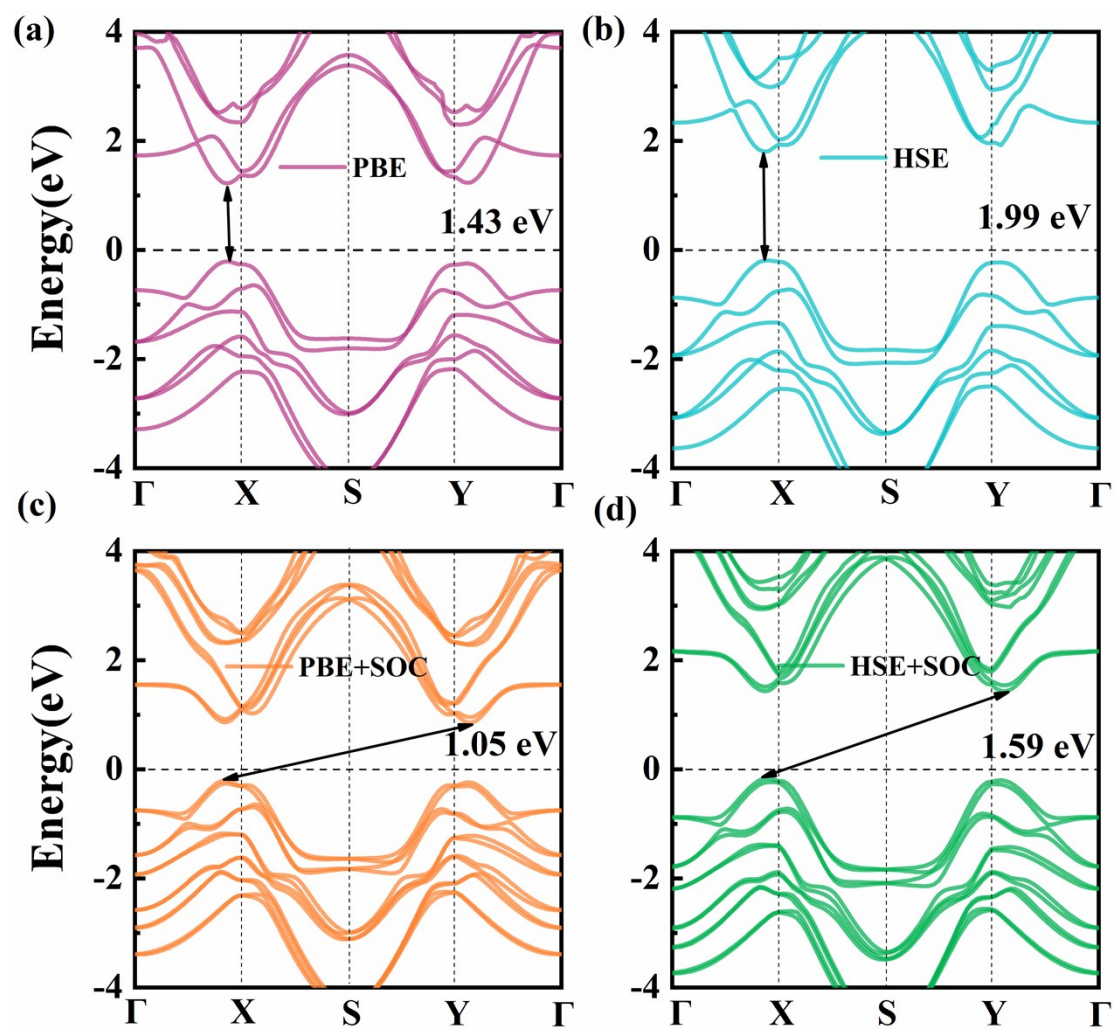

Fig. S2. The electronic band structures of monolayer  $\text{Pb}_2\text{SSe}$  calculated at the (a) PBE and HSE06, (b) PBE+SOC and HSE06+SOC level, respectively.

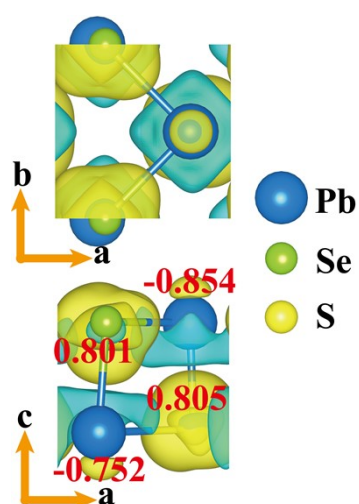

Fig. S3. Views along c direction and along b direction of charge density difference for  $\text{Pb}_2\text{SSe}$  monolayer.

**Table S3.** The lattice constants ( $a$  and  $b$ ) Å, interlayer distances ( $d$ ) Å and interlayer binding energy ( $E_b$ ) meV/Å<sup>2</sup> of bilayer Pb<sub>2</sub>SSe.

| Structure | $a$ (Å) | $b$ (Å) | $d$ (Å) | $E_b$ (meV/ Å <sup>2</sup> ) |
|-----------|---------|---------|---------|------------------------------|
| (a)       | 4.349   | 4.307   | 3.32    | -81.21                       |
| (b)       | 4.386   | 4.278   | 3.87    | -78.22                       |
| (c)       | 4.319   | 4.342   | 3.72    | -79.06                       |
| (d)       | 4.351   | 4.309   | 3.69    | -68.79                       |

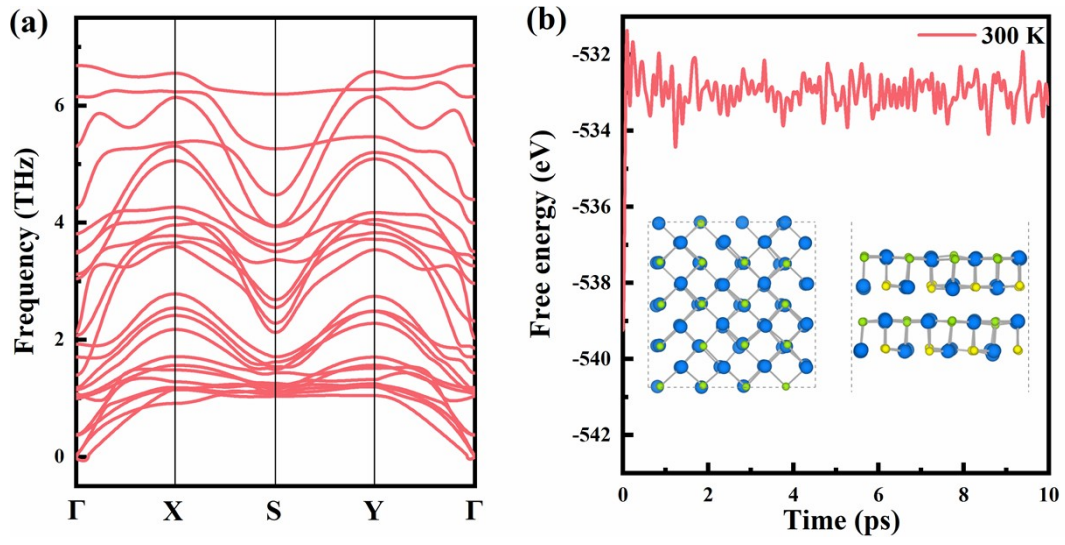

**Fig. S4.** (a) Phonon spectrum of Pb<sub>2</sub>SSe bilayers. (b) Free energy fluctuation and final structures in AIMD simulation at 300 K.

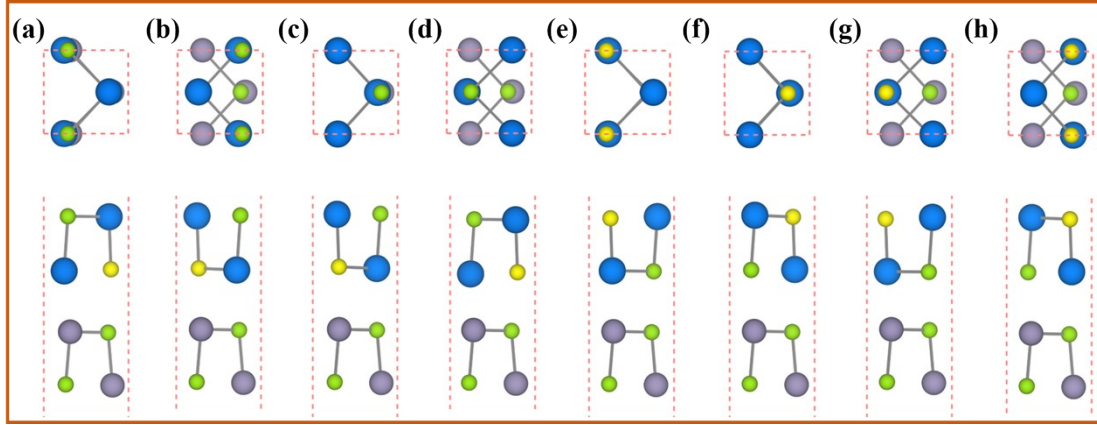

**Fig. S5.** (a-h) The structure of different stacking patterns of the  $\text{Pb}_2\text{SSe/SnSe}$  and  $\text{Pb}_2\text{SSe/GeSe}$  heterostructures.

**Table S4.** The lattice constants ( $a$  and  $b$ ) Å, interlayer distances ( $d$ ) Å and interlayer binding energy ( $E_b$ ) meV/Å<sup>2</sup> of the  $\text{Pb}_2\text{SSe/SnSe}$  and  $\text{Pb}_2\text{SSe/GeSe}$  heterostructures.

| Structure | $a$   | $b$   | $d$   | $E_b$  |
|-----------|-------|-------|-------|--------|
| SnSe      | 4.397 | 4.294 |       |        |
| GeSe      | 4.289 | 3.974 |       |        |
| a         | 4.422 | 4.266 | 3.642 | -25.73 |
| b         | 4.425 | 4.264 | 3.826 | -25.72 |
| c         | 4.430 | 4.274 | 3.450 | -27.18 |
| d         | 4.359 | 4.288 | 3.357 | -24.47 |
| e         | 4.394 | 4.293 | 3.578 | -26.74 |
| f         | 4.403 | 4.282 | 3.329 | -25.86 |
| g         | 4.387 | 4.287 | 3.620 | -18.11 |
| h         | 4.440 | 4.269 | 3.762 | -26.63 |
| A         | 4.375 | 4.114 | 3.452 | -13.71 |
| B         | 4.409 | 4.111 | 3.456 | -21.28 |
| C         | 4.408 | 4.110 | 3.446 | -21.30 |
| D         | 4.406 | 4.109 | 3.742 | -20.14 |
| E         | 4.373 | 4.120 | 3.519 | -21.27 |
| F         | 4.379 | 4.112 | 3.509 | -14.24 |
| G         | 4.373 | 4.121 | 3.357 | -20.47 |
| H         | 4.402 | 4.110 | 3.754 | -20.82 |

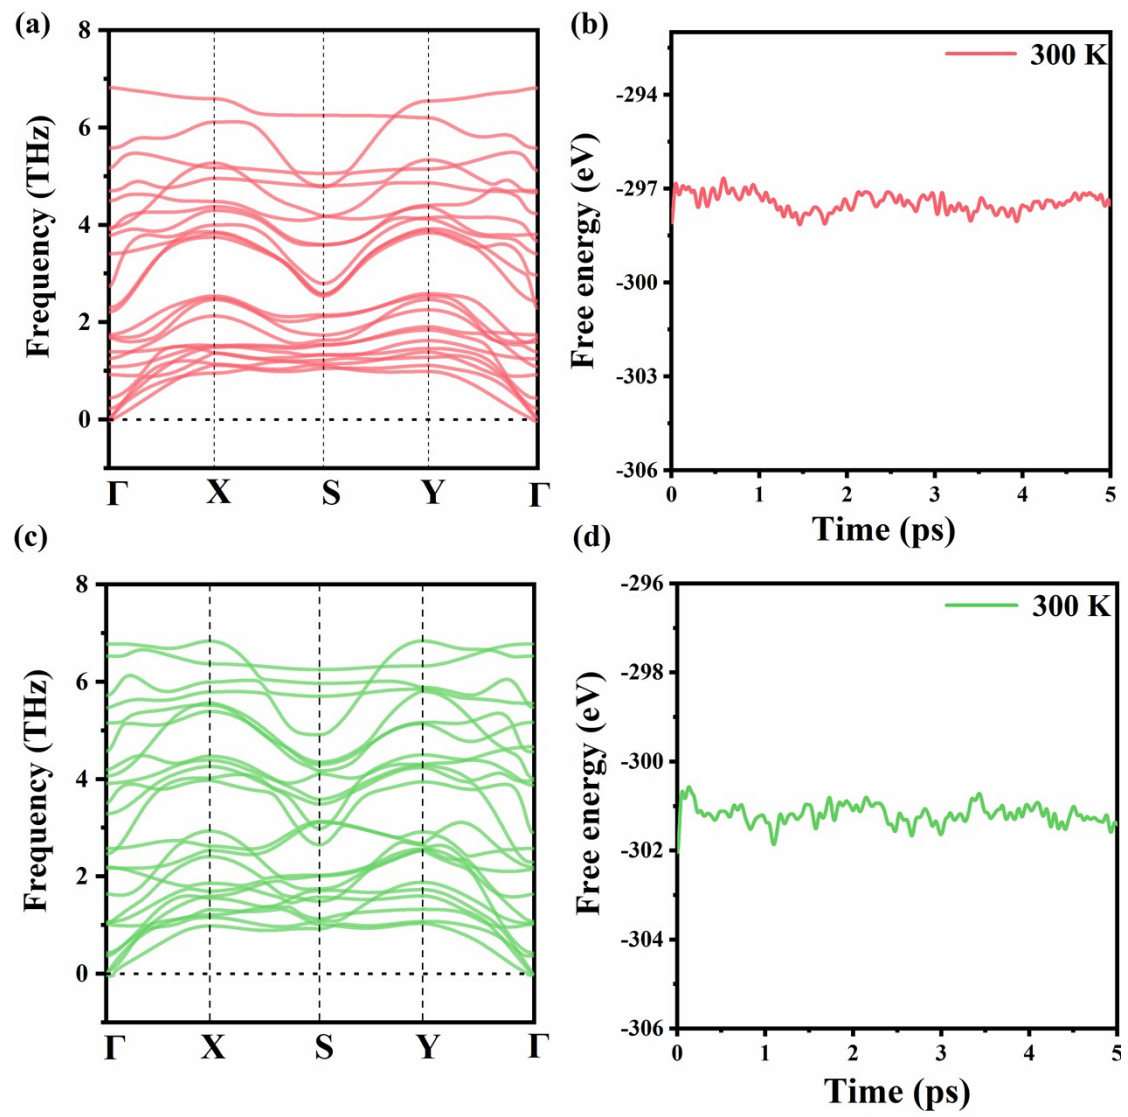

**Fig. S6.** (a) and (c) Phonon spectrum of  $\text{Pb}_2\text{SSe}/\text{SnSe}$  and  $\text{Pb}_2\text{SSe}/\text{GeSe}$  heterostructures. (b) and (d) Free energy fluctuation and final structures in AIMD simulation at 300 K for  $\text{Pb}_2\text{SSe}/\text{SnSe}$  and  $\text{Pb}_2\text{SSe}/\text{GeSe}$  heterostructures.



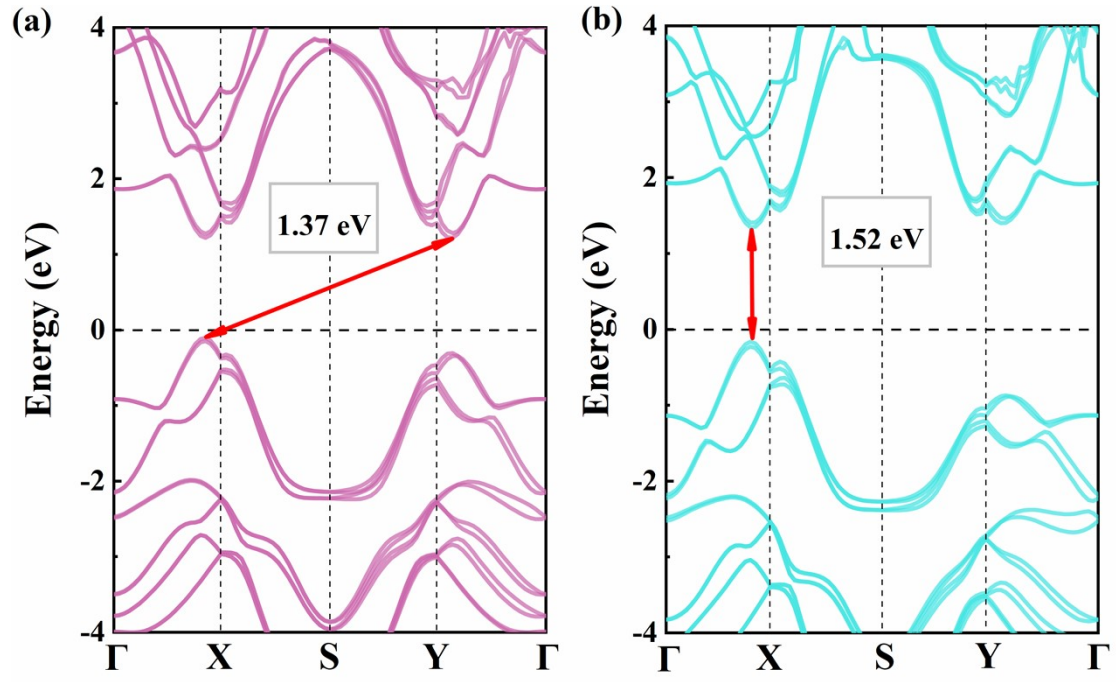

**Fig. S7.** (a) and (b) The band structures of SnSe and GeSe monolayers using HSE06 functional with consideration of SOC effect.

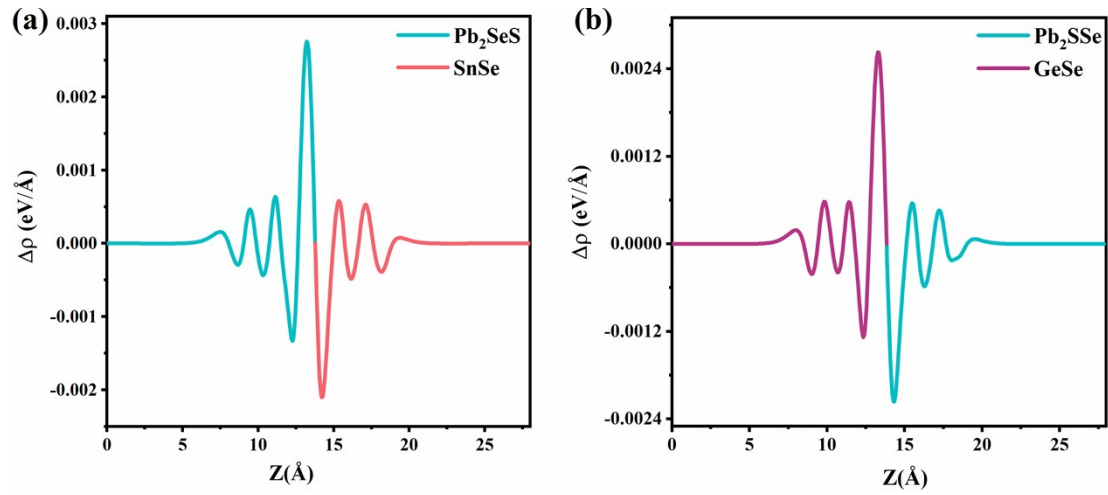

**Fig. S8.** (a) and (b) Plane averaged charge density difference of Pb<sub>2</sub>SSe/SnSe and Pb<sub>2</sub>SSe/GeSe heterostructures, respectively.

**Table S5.** The calculated work functions of the monolayers and heterostructures.

| System        | SnSe | GeSe | Pb <sub>2</sub> SSe | Pb <sub>2</sub> SSe/SnSe | Pb <sub>2</sub> SSe/GeSe |
|---------------|------|------|---------------------|--------------------------|--------------------------|
| Work function | 4.28 | 4.36 | 4.33                | 4.24                     | 4.30                     |

**Table S6.** The Calculated effective mass ( $m^*$ ), Elastic Moduli ( $C$ ), Deformation potentials ( $E_d$ ), carrier mobility and carrier relaxation time of monolayer  $\text{Pb}_2\text{SSe}$  along x and y directions.

| Material                            | direction | Carrier type | $m^*/m_0$ | $C$ (N m <sup>-1</sup> ) | $E_d$ (eV) | $\mu$ (cm <sup>2</sup> V <sup>-1</sup> s <sup>-1</sup> ) |
|-------------------------------------|-----------|--------------|-----------|--------------------------|------------|----------------------------------------------------------|
| $\text{Pb}_2\text{SSe}/\text{SnSe}$ | x         | e            | 0.22      | 39.8                     | 0.39       | 77292                                                    |
|                                     |           | h            | 0.38      | 39.8                     | 3.82       | 270                                                      |
|                                     | y         | e            | 0.17      | 78.7                     | 4.39       | 2020                                                     |
|                                     |           | h            | 0.25      | 78.7                     | 7.65       | 308                                                      |
| $\text{Pb}_2\text{SSe}/\text{GnSe}$ | x         | e            | 0.20      | 46.7                     | 1.49       | 7530                                                     |
|                                     |           | h            | 0.39      | 46.7                     | 7.31       | 82                                                       |
|                                     | y         | e            | 0.24      | 80.3                     | 1.86       | 5754                                                     |
|                                     |           | h            | 0.22      | 80.3                     | 5.54       | 773                                                      |

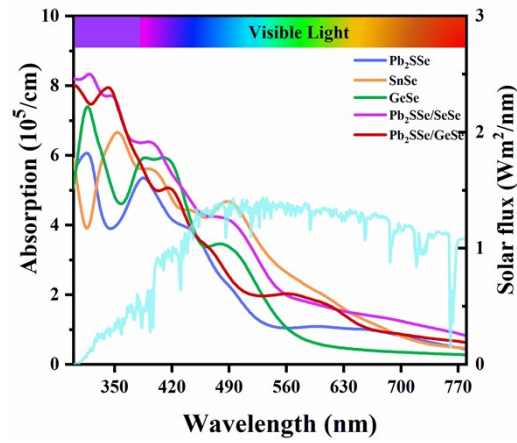

**Fig. S9.** The optical absorption spectrum of the monolayer  $\text{Pb}_2\text{SSe}$ ,  $\text{SnSe}$ ,  $\text{GeSe}$   $\text{Pb}_2\text{SSe}/\text{SnSe}$  and  $\text{Pb}_2\text{SSe}/\text{GeSe}$  heterostructures along y direction.

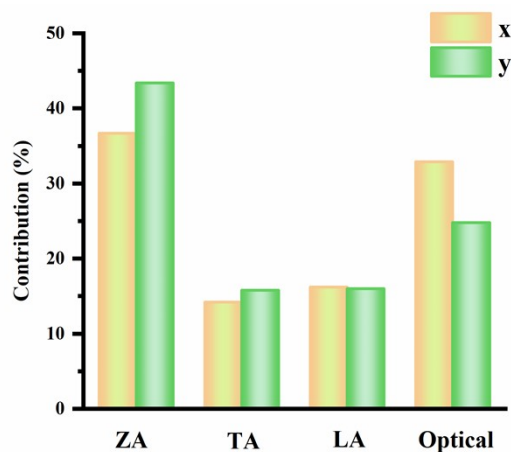

**Fig. S10.** Phonon modes (ZA, TA, LA and Optical) contributions towards the total  $\kappa_L$  at 300 K along x and y directions for the  $\text{Pb}_2\text{SSe}$  monolayer.

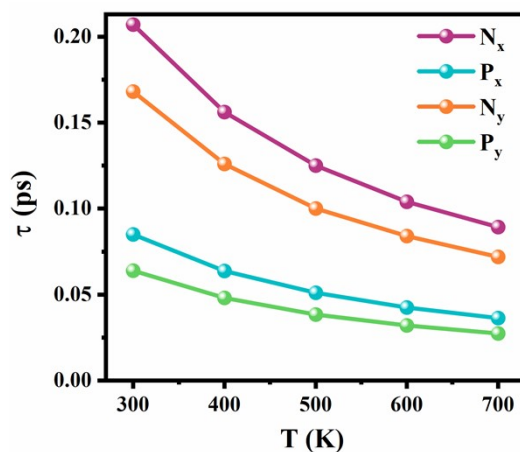

**Fig. S11.** The temperature dependence of relaxation time ( $\tau$ ) for p- and n-type doping along x and y directions.

## Reference

1. A. K. Singh, K. Mathew, H. L. Zhuang and R. G. Hennig, *J. of Phys. Chem. Lett.*, 2015, **6**, 1087-1098.
2. Y. H. Robin Chang, T. L. Yoon, K. H. Yeoh and T. L. Lim, *Int. J. Energy Res.* 2021, **45**, 2085-2099.
3. J. Dai and X. C. Zeng, *J. Phys. Chem. Lett.*, 2014, **5**, 1289-1293.
